# Supplementary material
Source: bioRxiv or medRxiv preprint supplement (https://medrxiv.org/highwire/filestream/73893/field_highwire_adjunct_files/0/2020.03.16.20037176-1.pdf)
Supplement: Supplementary file [file 2020.03.16.20037176-1.pdf]

# Hundreds of severe pediatric COVID-19 infections in Wuhan prior to the lockdown

Zhanwei Du, Ciara Nugent, Benjamin John Cowling, Lauren Ancel Meyers

## Supplementary Appendix

**Table S1. Model Parameters and Data Sources**

| Symbol         | Description                                                                                                | Values                                                                                           | Sources                                                                                                                                                                                                                   |
|----------------|------------------------------------------------------------------------------------------------------------|--------------------------------------------------------------------------------------------------|---------------------------------------------------------------------------------------------------------------------------------------------------------------------------------------------------------------------------|
| $H_{d,a,\tau}$ | Number of children in age group $a$ hospitalized for COVID-19 in district $d$ over a period of time $\tau$ | Estimated                                                                                        |                                                                                                                                                                                                                           |
| $r$            | Ratio of COVID-19 pediatric hospitalizations to influenza pediatric hospitalizations                       | 0.15 [95% CI: 0.06-0.32]                                                                         | Ref. <sup>1</sup> (6 COVID-19, 23 influenza A, and 20 influenza B positive among 336 tested samples from hospitalized children with severe respiratory illness from three hospitals in central Wuhan, January 7-15, 2020. |
| $N_d^a$        | Population size of age group $a$ in district $d$                                                           | 2010 age-stratified population scaled by ratio of 2019 to 2010 total Wuhan population (Table S1) | Sixth National Census of the People's Republic of China in 2010 <sup>2</sup> and total population of Wuhan in 2019 (11.08 million) <sup>3</sup>                                                                           |
| $\Phi_\tau$    | Influenza incidence proxy (ILI+) January 7-15, 2020 <sup>†</sup>                                           | 3.49%                                                                                            | China CDC <sup>4</sup> weekly reports of ILI% and percent influenza positive in the South Provinces*, interpolated for January 7-15, 2020.                                                                                |
| $\Phi_A$       | Cumulative annual influenza incidence proxy (ILI+) in Wuhan, April 4, 2011-April 8, 2012 <sup>†</sup>      | 24.6%                                                                                            | China CDC <sup>4</sup> weekly reports of ILI% and percent influenza positive in the South Provinces*, April 4, 2011-April 8, 2012.                                                                                        |

|            |                                                                                       |                                                                                                   |                                                                                           |
|------------|---------------------------------------------------------------------------------------|---------------------------------------------------------------------------------------------------|-------------------------------------------------------------------------------------------|
| $\Omega_a$ | Annual hospitalization rates (per 100,000) attributable to influenza in age group $a$ | median (full range)<br>0-4y: 2,349 (2,321-2,378)<br>5-9y: 958 (900-1061)<br>10-14y: 176 (156-182) | Data for the city of Jingzhou in Hubei province, April 4, 2011-April 8, 2012 <sup>5</sup> |
| $T_d$      | Epidemic doubling time                                                                | 7.3 days<br>[95% CrI: 6.3–9.7 days]                                                               | Ref. <sup>6</sup>                                                                         |

\* The Chinese CDC's *South Provinces* region includes the following 15 provincial-level administrative divisions with a total population of over 700 million including the 58 million residents of Hubei Province: Shanghai, Chongqing, Jiangsu, Anhui, Hunan, Hubei, Sichuan, Yunnan, Guizhou, Guangdong, Guangxi, Fujian, Jiangxi, Zhejiang, and Hainan<sup>7</sup>.

† Following ref.<sup>8</sup>, we estimate a *proxy* for influenza incidence by multiplying percent ILI (ratio of number of ILI patients treated to total patients treated) by percent influenza positive (percent of ILI samples testing positive for influenza).

**Table S1. Estimated COVID-19 pediatric hospitalizations in the 13 central districts of Wuhan, for January 7-15, 2020. Values are medians and 95% bounds across 1,000 Monte Carlo samples.**

| District     | Population (<17) | Hospitalizations     |                  |             |              |
|--------------|------------------|----------------------|------------------|-------------|--------------|
|              |                  | all (<17)            | 0-4              | 5-9         | 10-16        |
| Hongshan*    | 318,467          | 38 (19-68)           | 25 (9-53)        | 8 (2-19)    | 4 (0-12)     |
| Xinzhou      | 262,295          | 34 (17-62.5)         | 22 (8-50)        | 8 (1-18.5)  | 3 (0-9)      |
| Huangpi      | 244,825          | 34.5 (16.5-62)       | 22 (7-49.5)      | 8 (2-19)    | 3 (0-9)      |
| Wuchang*     | 239,352          | 31 (15-58.5)         | 20 (6-45.5)      | 8 (2-18)    | 3 (0-9)      |
| Jiangxia     | 227,060          | 28 (13-50.5)         | 18 (6-39)        | 5 (1-13)    | 3 (0-9)      |
| Jiang'an*    | 183,889          | 26 (11-47)           | 17 (5-38)        | 6 (1-15)    | 2 (0-6.5)    |
| Qiaokou*     | 170,896          | 23 (11-42)           | 15 (4-32.5)      | 5 (1-13)    | 2 (0-6)      |
| Caidian      | 152,735          | 23 (10-42)           | 15 (5-33)        | 5 (1-13)    | 2 (0-5.5)    |
| Jianghan*    | 138,044          | 20 (9-36)            | 13 (4-29)        | 5 (1-13)    | 1 (0-5)      |
| Dongxihu     | 118,805          | 18 (7-34)            | 12 (3-28)        | 4 (0-11)    | 1 (0-4)      |
| Hanyang*     | 116,745          | 17 (6-32)            | 11 (2-26)        | 4 (0-10)    | 1 (0-5)      |
| Qingshan*    | 96,761           | 14 (5-27)            | 9 (2-20.5)       | 3 (0-9)     | 1 (0-4)      |
| Hannan       | 27,319           | 4 (0-9)              | 2 (0-8)          | 1 (0-4)     | 0 (0-2)      |
| <b>Total</b> | 2,297,193        | <b>313 (171-520)</b> | 202.5 (79-414.5) | 71 (29-158) | 27 (10-62.5) |

\* These 7 districts are located in central Wuhan; the other six are suburban.

## Data

We analyzed the following surveillance data published in the Chinese Influenza Weekly Report<sup>4</sup> (Table S1): (1) the percentage of outpatient or emergency visits for ILI at national sentinel hospitals in the CDC's South Provinces region and (2) the proportion of ILI samples that test positive for influenza by public health laboratories in the South Provinces, which test an average of five thousand samples per week. We estimated age-stratified population sizes in each of the 13 Wuhan districts using data from the Sixth National Population Census of the People's Republic of China in 2010<sup>2</sup>, and scaling by the growth in overall Wuhan population between 2010 and 2019. We obtained the annual per capita influenza hospitalizations for 0-14 year olds for the city of Jingzhou in Hubei province (April 4, 2011-April 8, 2012)<sup>5</sup> and made the simplifying assumption that that 15-16 year olds (who are aggregated into the 15-49 age group) have the same influenza hospitalization rate as 10-14 year olds.

## Method

We assume that the age-specific risks of COVID-19 and influenza virus infection were identical across all 13 central districts of Wuhan. Therefore, the ratio of COVID-19 to influenza pediatric hospitalizations ( $r$ ) estimated from the subset of hospitals sampled in ref.<sup>1</sup> can be used to estimate hospitalization rates across all of central Wuhan (Figure A.1).

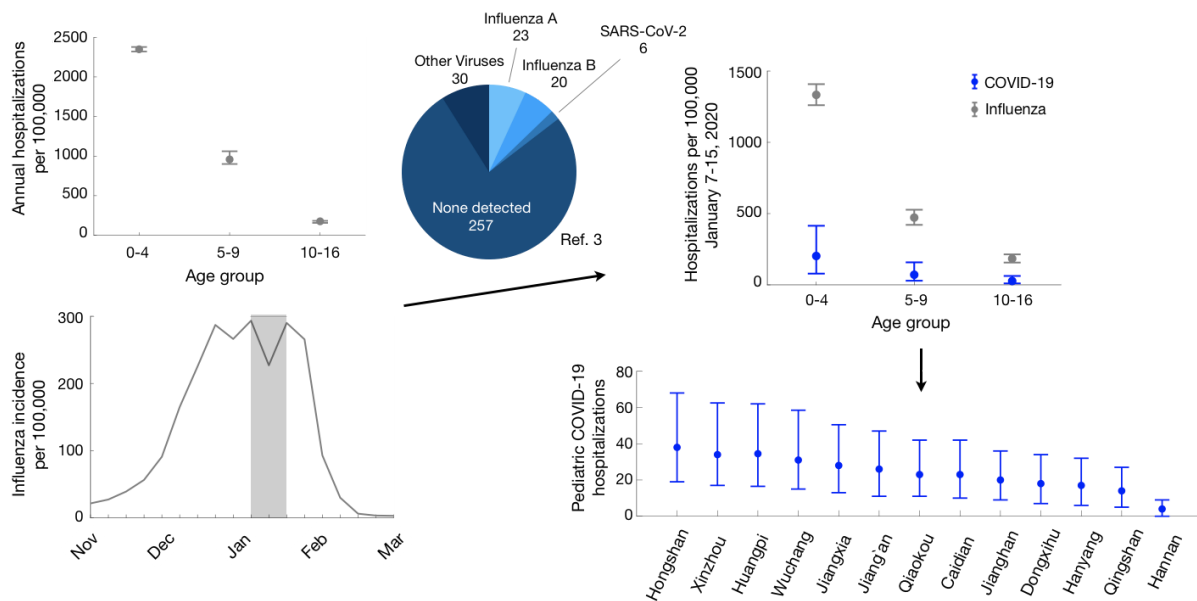

**Figure A.1. Estimating pediatric COVID-19 hospitalizations from pediatric influenza hospitalizations in Wuhan, based on the ratio between hospitalized cases testing positive for the two viruses in three hospitals in Central Wuhan, January 7-15, 2020.** First we use influenza surveillance data (percent ILI, percent positive influenza tests, and annual influenza hospitalizations reported for the Wuhan region by the Chinese CDC [ref]) to estimate the rate of pediatric hospitalizations for influenza during January 7-15, 2020 (left graphs). Second, we estimate the ratio of COVID-19 to influenza pediatric hospitalizations based on a

recent retrospective study in three Wuhan hospitals during January 7-15, 2020 (0.15 [95% CI: 0.06-0.32]). We estimate pediatric COVID-19 hospitalization rates based on the age-specific influenza hospitalization rates and our estimated ratio of COVID-19 to influenza hospitalizations, using Monte Carlo sampling to incorporate uncertainty in our estimates of both quantities (upper right). Finally, we estimate the age-specific COVID-19 pediatric hospitalizations for the 13 central districts in central Wuhan based on the district level population sizes for each age group. Given that the six detected COVID-19 cases reported in ref.<sup>1</sup> were from four different districts spanning Wuhan plus a city outside of Wuhan, we assumed that risk was uniform across all 13 districts during the nine-day time period.

### *Estimating COVID-19 pediatric hospitalizations Wuhan*

We take a Bayesian approach to estimating the number of COVID-19 hospitalizations in district  $d$  among children in age range  $a$  (0-4, 5-9 or 10-16 years) during the focal nine-day period  $\tau$  ( $H_{d,a,\tau}$ ). We first estimate the ratio ( $r$ ) of COVID-19 cases to influenza cases among children from the retrospective sample<sup>1</sup> using a Bayesian model, and then use this to predict the hospitalizations in each district and age range by assuming:

$$H_{d,a,\tau} \mid N_d^a, \Omega_a, \Phi_\tau, \Phi_A, r \sim B \left( N_d^a, \Omega_a \cdot \frac{\Phi_\tau}{\Phi_A} \cdot r \right)$$

where  $N_d^a$  is the number of children of age group  $a$  in district  $d$ ,  $\Omega_a$  is the annual hospitalization rate for influenza in children of age group  $a$ ,  $\Phi_\tau$  is a proxy proportional to influenza incidence in southern China for January 7-15, 2020,  $\Phi_A$  is a proxy proportional to the cumulative annual influenza incidence in southern China based on surveillance data from 2011-2012, and  $r$  is the ratio of pediatric COVID-19 hospitalizations to pediatric influenza hospitalizations. In other words, we multiply the number of influenza-related hospitalizations by the ratio of COVID-19 to influenza hospitalizations, both estimated for Wuhan during January 7-15, 2020.

We take a Bayesian approach to derive the posterior distribution for  $r$  as follows. Let  $N$  denote the total number of children in the sample. Let  $x_c$  and  $x_f$  denote the observed number of children with COVID-19 and influenza, respectively. Then

$$x_c \mid p_c, N \sim B(N, p_c) \text{ and } x_f \mid p_f, N \sim B(N, p_f).$$

If we assume uninformative priors on  $p_c$  and  $p_f$ ,

$$p_c \sim \text{Beta}(1, 1) \text{ and } p_f \sim \text{Beta}(1, 1)$$

then the posterior distributions are known in closed form<sup>9</sup>:

$$p_c \mid x_c, N \sim \text{Beta}(1 + x_c, 1 + N - x_c) \sim \text{Beta}(7, 331)$$

$$p_f \mid x_f, N \sim \text{Beta}(1 + x_f, 1 + N - x_f) \sim \text{Beta}(44, 294)$$

We use MCMC to take draws from  $p_c$  and  $p_f$ , and then calculate  $r = p_c/p_f$  to obtain the distribution for  $r$ . We thereby estimate that the ratio of COVID-19 to influenza pediatric hospitalizations across central Wuhan during January 7-15, 2020 was 0.15 [95% CI: 0.06-0.32].

Using 1,000 draws from the distribution of  $r$ , we estimate  $H_{d,a,\tau}$  for each district and age group. For each draw, we also sample from  $\Omega_a$ , assuming triangular distributions with bounds and mode given in Table S1, and point estimates for all other parameters given in Table S1. We report the means and 95% credible intervals of the resulting posterior predictive distribution for each district.

#### *Estimating cumulative COVID-19 pediatric hospitalizations prior to Wuhan lockdown*

To project the cumulative number of pediatric hospitalizations in Wuhan preceding the January 23, 2020 lockdown ( $H_{\text{cum}}$ ), we assume

$$H_{\text{cum}} = \sum_{i=t_0}^L h_0 \cdot 2^{i/T_d}$$

where  $T_d$  is the epidemic doubling time,  $t_0$  is the day of the first pediatric hospitalization in Wuhan, and  $L$  corresponds to January 22, 2020 (the day before the Wuhan lockdown). We use our age and district stratified estimates for pediatric COVID-19 hospitalizations for January 7-15, 2020 to estimate this quantity, under the assumption that the values reflect cumulative incident hospitalizations during that nine-day period (Figure A.2).

We use Monte Carlo sampling to incorporate the uncertainty in both the epidemic doubling rate in Wuhan during this period<sup>6</sup> and pediatric hospitalizations during January 7-15, 2020 ( $H_{a,d,\tau}$ ). We take draws from the distribution of  $H_{a,d,\tau}$  and  $T_d$  (summarized in Table S1) to estimate the time since the first pediatric hospitalization by

$$\delta = T_D \left( \log_2 \left( \frac{H_\tau}{\sum_{i=0}^8 2^{i/T_d}} \right) \right).$$

That is, the estimated first day of a pediatric hospitalization in Wuhan ( $t_0$ ) is  $\delta$  days prior to January 7, 2020. We then estimate  $H_{\text{cum}}$  according to the equation above to project the cumulative COVID-19 pediatric hospitalizations preceding the Wuhan lockdown.

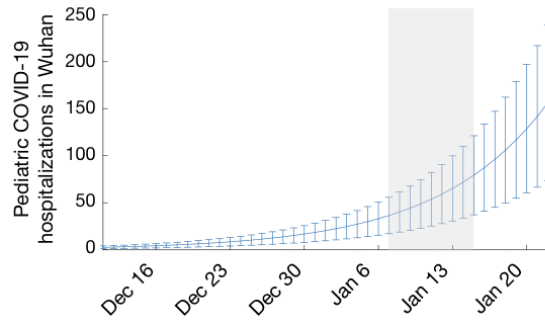

**Figure A.2. Estimating the cumulative COVID-19 pediatric hospitalizations in 13 central districts of Wuhan prior to the Wuhan lockdown.** Assuming an epidemic doubling rate of 7.3 [95% CrI: 6.3–9.7] days and that the COVID-19 pediatric hospitalization numbers estimated for the 13 districts (Table S1) are the cumulative number of incident hospitalizations from January 7-15, 2020, we use an exponential model of epidemic growth to estimate the timing of the first pediatric hospitalization and then project the cumulative number of pediatric hospitalizations prior to January 23, 2020.

## References

- 1 Liu W, Zhang Q, Chen J, *et al.* Detection of Covid-19 in Children in Early January 2020 in Wuhan, China. *N Engl J Med* 2020; published online March 12. DOI:10.1056/NEJMc2003717.
- 2 CNBo S. The Sixth National Population Census of the People's Republic of China. *China: China National Bureau of Statistics* 2010.
- 3 Wuhan Statistics Bureau. Wuhan city. 2019; published online April 26. <http://tjj.wuhan.gov.cn/details.aspx?id=83> (accessed March 13, 2020).
- 4 Chinese Influenza Weekly Report (Week 01 2020). [http://www.chinaivdc.cn/cnic/en/Surveillance/WeeklyReport/202001/t20200110\\_211164.htm](http://www.chinaivdc.cn/cnic/en/Surveillance/WeeklyReport/202001/t20200110_211164.htm) (accessed March 7, 2020).
- 5 Yu H, Huang J, Huai Y, *et al.* The substantial hospitalization burden of influenza in central China: surveillance for severe, acute respiratory infection, and influenza viruses, 2010--2012. *Influenza Other Respi Viruses* 2014; **8**: 53--65.
- 6 Zhanwei Du, Lin Wang, Simon Cauchemez, *et al.* Risk for Transportation of 2019 Novel Coronavirus Disease from Wuhan to Other Cities in China. *Emerging Infectious Disease journal* 2020; **26**. DOI:10.3201/eid2605.200146.
- 7 Chinese National Influenza Center. <http://ivdc.chinacdc.cn/cnic/> (accessed March 14, 2020).
- 8 Goldstein E, Cobey S, Takahashi S, Miller JC, Lipsitch M. Predicting the epidemic sizes of influenza A/H1N1, A/H3N2, and B: a statistical method. *PLoS Med* 2011; **8**: e1001051.
- 9 Berger JO, Yang R. A catalog of noninformative priors. ISDS Discussion Paper, Duke Univ, 1997.
